# Supplementary material for: What makes community health worker models for tuberculosis active case finding work? A cross-sectional study of TB REACH projects to identify success factors for increasing case notifications
Source: Springer Nature journal article supplement (doi:10.1186/s12960-022-00708-1), 2022-03-12
Supplement: MOESM1 [file 20213494]

**Table A1: Univariate association between community health worker activities and notification impact**

|                                      | Coef.  | 95%CI          | p-value |
|--------------------------------------|--------|----------------|---------|
| TB and other activities              | ref    | ..             | ..      |
| Solely TB                            | -14.73 | -42.97 – 13.51 | 0.300   |
| Time spent on TB-related activities  | -0.34  | -0.76 – 0.77   | 0.107   |
| Community outreach                   | -0.62  | -41.05 – 39.80 | 0.975   |
| Verbal screening                     | 18.41  | -21.65 – 58.48 | 0.360   |
| HIV testing                          | -7.44  | -59.06 – 44.19 | 0.733   |
| Sputum collection and transportation | -5.11  | -35.95 – 25.74 | 0.741   |
| Linkage to treatment                 | 10.23  | -19.87 – 40.34 | 0.498   |
| Treatment counseling                 | 20.94  | -6.11 – 48.00  | 0.126   |

**Table A2: Univariate association between community health worker factors and project additionality per community health worker (percent additionality trend adjusted)**

|                                                                        | Coef.  | 95%CI          | p-value      |
|------------------------------------------------------------------------|--------|----------------|--------------|
| <b>CHW characteristics</b>                                             |        |                |              |
| Age                                                                    | -0.99  | -2.87 -0.90    | 0.296        |
| Sex                                                                    |        |                |              |
| Male (%)                                                               | -0.15  | -0.66 – 0.35   | 0.543        |
| Female (%)                                                             | 0.20   | -0.29 – 0.69   | 0.425        |
| Other (%)                                                              | -0.33  | -1.59 – 0.93   | 0.599        |
| Prior experience                                                       | -2.89  | -34.56 – 28.77 | 0.855        |
| Years of education                                                     | -1.10  | -5.27 -3.07    | 0.597        |
| At the height of the project, number of CHWs employed in one month     | 0.05   | 0.01 – 0.09    | <b>0.022</b> |
| During the full duration of the project, number of CHWs on the project | 0.03   | 0.01 – 0.05    | <b>0.013</b> |
| CHWs peak/total                                                        | 0.11   | -0.25 – 0.49   | 0.527        |
| <b>Recruitment/selection</b>                                           |        |                |              |
| CHWs provided with written contracts                                   | -28.14 | -67.26 – 10.97 | 0.154        |
| Contracts provided                                                     |        |                |              |
| By TB REACH grantee                                                    | -17.71 | -45.09 – 9.67  | 0.199        |
| By a government entity                                                 | 27.25  | -10.21 – 64.72 | 0.149        |
| An NGO (not grantee)                                                   | 2.95   | -28.56 – 34.46 | 0.851        |
| All CHWs provided the same contract                                    | -29.97 | -59.86 – 0.08  | <b>0.049</b> |
| <b>Training</b>                                                        |        |                |              |
| <b>Pre-service training</b>                                            |        |                |              |
| <b>Type of pre-service training</b>                                    |        |                |              |
| Face-to-face with expert                                               | 6.11   | -52.24 - 64.46 | 0.834        |
| Classroom                                                              | 23.08  | -47.36 - 93.51 | 0.513        |
| Community                                                              | 19.28  | -9.06 - 47.61  | 0.178        |
| Peer-to-peer                                                           | -10.90 | -38.54 - 16.73 | 0.432        |
| E-learning                                                             | 94.83  | 29.65 - 160.01 | <b>0.005</b> |
| Hands on                                                               | 18.02  | -24.32 - 60.37 | 0.396        |
| Pre-service training hours                                             | 0.59   | -0.38 - 1.56   | 0.229        |
| Training compensation provided                                         | -33.00 | -74.84 - 8.84  | 0.119        |
| Training materials were provided to the CHWs during training           | -4.33  | -47.78 - 39.11 | 0.842        |
| Training certificate                                                   | 4.82   | -26.23 - 35.87 | 0.756        |
| <b>Preservice training: Treatment support</b>                          |        |                |              |
| DOT procedures                                                         | 28.86  | -10.97 - 68.68 | 0.151        |
| Patient counselling                                                    | 14.41  | -28.54 - 57.36 | 0.503        |
| Social and psychological needs of TB patients                          | -22.63 | -54.86 - 9.60  | 0.164        |
| Psychosocial support                                                   | -0.61  | -34.32 - 33.10 | 0.971        |
| <b>Refresher training</b>                                              |        |                |              |
| Frequency of refresher training                                        | 0.67   | -2.47 - 3.82   | 0.668        |
| Average length of refresher training                                   | 0.58   | -1.15 - 2.29   | 0.504        |
| <b>Types of refresher training</b>                                     |        |                |              |
| Formal                                                                 | 6.51   | -23.45 - 36.47 | 0.664        |
| Informal/None                                                          | ref    | ..             | ..           |
| <b>Formal Training</b>                                                 |        |                |              |
| Face-to-face with expert trainer                                       | 12.94  | -70.89 - 96.77 | 0.754        |
| Face-to-face in classroom                                              | -32.74 | -83.46 - 17.96 | 0.197        |
| Face-to-face in community                                              | 21.71  | -18.91 - 62.34 | 0.283        |
| Peer-to-peer training                                                  | -31.71 | -74.16 - 10.74 | 0.137        |
| E-learning                                                             | 77.54  | -1.09 - 156.18 | 0.053        |
| Hands on training                                                      | 26.05  | -22.29 - 74.38 | 0.279        |
| Training compensation provided                                         | 12.34  | -15.01 - 39.70 | 0.368        |
| <b>Compensation</b>                                                    |        |                |              |
| <b>Fixed component (salary or stipend)</b>                             |        |                |              |
| Yes                                                                    | -5.16  | -36.74 - 26.41 | 0.744        |
| <b>Compensation was constant</b>                                       |        |                |              |

|                                                                                                              |        |                |        |
|--------------------------------------------------------------------------------------------------------------|--------|----------------|--------|
| Yes (constant)                                                                                               | 9.54   | -22.65 - 41.73 | 0.551  |
| No (changed)                                                                                                 | ref    | ..             | ..     |
| <b>CHWs compensated equally for the fixed component, or did it vary within implementation areas</b>          |        |                |        |
| Compensated equally                                                                                          | ref    |                |        |
| Compensated differently                                                                                      | 9.30   | -23.17 - 41.78 | 0.564  |
| Average compensation/month                                                                                   | 12.34  | -15.01 - 39.70 | 0.368  |
| <b>CHW compensation - variable components</b>                                                                |        |                |        |
| Variable component (performance-based incentives)                                                            | 8.49   | -15.79 - 32.78 | 0.485  |
| Average compensation/month                                                                                   | -0.04  | -0.37 - 0.27   | 0.755  |
| Average minimum compensation/month                                                                           | -0.48  | -1.85 - 0.89   | 0.475  |
| Average maximum compensation/month                                                                           | -0.13  | -0.40 - 0.13   | 0.303  |
| <b>CHW compensation - non-monetary components</b>                                                            |        |                |        |
| Food                                                                                                         | -15.90 | -58.82 - 27.03 | 0.459  |
| Supplements                                                                                                  | -14.64 | -64.21 - 34.91 | 0.554  |
| Stationery                                                                                                   | 21.15  | -24.41 - 66.71 | 0.354  |
| Clothing                                                                                                     | 12.68  | -19.70 - 45.07 | 0.434  |
| Mode of transport (motorbike, car, bicycle)                                                                  | 5.41   | -26.67 - 37.49 | 0.735  |
| Right to retain project technology such as tablets or phones                                                 | 3.88   | -29.11 - 36.86 | 0.814  |
| Priority access to TB/HIV or other disease testing                                                           | -9.09  | -41.98 - 23.78 | 0.580  |
| Health insurance                                                                                             | -11.82 | -54.88 - 31.24 | 0.582  |
| <b>Supervision</b>                                                                                           |        |                |        |
| Performance issues addressed by direct supervisor                                                            | -1.40  | -49.18 - 46.39 | 0.953  |
| Performance managed addressed by upper management                                                            | 19.84  | -21.11 - 60.80 | 0.334  |
| <b>Gender of Supervisors</b>                                                                                 |        |                |        |
| Male (%)                                                                                                     | 0.41   | -0.06 - 0.88   | 0.086  |
| Female (%)                                                                                                   | -0.41  | -0.88 - 0.07   | 0.086  |
| Average CHWs per supervisor                                                                                  | 0.38   | 0.20 - 0.57    | <0.001 |
| <b>Paper- or electronic-based tools used to monitor CHW activities</b>                                       |        |                |        |
| Paper based                                                                                                  | ref    |                |        |
| Electronic                                                                                                   | -10.33 | -63.62 - 42.93 | 0.698  |
| Both                                                                                                         | -4.04  | -33.33 - 25.24 | 0.782  |
| <b>Specific tools of screening</b>                                                                           |        |                |        |
| Screening data                                                                                               | 5.32   | -53.04 - 63.69 | 0.855  |
| GPS data                                                                                                     | -15.65 | -61.64 - 30.34 | 0.497  |
| Timesheets                                                                                                   | -12.77 | -40.82 - 15.29 | 0.365  |
| Financial data                                                                                               | 0.94   | -29.93 - 31.82 | 0.951  |
| Verification with external stakeholders (clinic staff)                                                       | -6.41  | -34.44 - 21.62 | 0.648  |
| Lab registers                                                                                                | 9.86   | -18.08 - 37.81 | 0.481  |
| Routine surveillance data                                                                                    | 9.50   | -19.64 - 38.63 | 0.515  |
| Customer Relationship Management Software                                                                    | -34.73 | -92.23 - 22.77 | 0.231  |
| Times supervisor reviewed work of CHWs per quarter                                                           | -0.04  | -0.80 - 0.71   | 0.912  |
| Times supervisor provided direct feedback per quarter                                                        | -0.04  | -0.67 - 0.58   | 0.876  |
| <b>Mobility and Sustainability</b>                                                                           |        |                |        |
| <b>CHWs promoted to a higher role within your organization during or after implementation of the project</b> |        |                |        |
| Yes                                                                                                          | -20.52 | -50.02 - 8.99  | 0.168  |
| <b>CHWs working on the TB REACH project keep their jobs at the close of the project?</b>                     |        |                |        |
| All CHWs kept their jobs after project                                                                       | 12.14  | -31.49 - 55.76 | 0.578  |
| A subset of CHWs kept their jobs after project                                                               | 11.05  | -27.86 - 49.96 | 0.570  |
| No                                                                                                           | ref    |                |        |
| <b>CHWs continue working with the same roles and responsibilities as during the TB REACH grant?</b>          |        |                |        |
| Yes                                                                                                          | 31.41  | -2.71 - 65.53  | 0.070  |

**Table A3: Factors Affecting Additionality**

| <b>Additionality</b>                     | <b>Reason</b>                                                                                                                                                                                                                                                 | <b>Recommendation</b>             | <b>N baseline</b> |
|------------------------------------------|---------------------------------------------------------------------------------------------------------------------------------------------------------------------------------------------------------------------------------------------------------------|-----------------------------------|-------------------|
| <b>Top 20% additionality projects</b>    |                                                                                                                                                                                                                                                               |                                   |                   |
| 2617                                     | Dilution risk due to small target population spread out over a large geographical area. Project did not have a control population. Additionality is calculated based on self-reported TB history.                                                             | Exclude                           | 23                |
| 1033                                     | Historical baseline case numbers were very small (4 and 7), causing additionality to reach a value over 1000%.                                                                                                                                                | Exclude                           | 1                 |
| 211                                      | 211% unadjusted change in baseline was calculated based on unusually low baseline data from facility registers. Project suggested using an alternative 59% additionality. This was the value utilized in our study.                                           | Use recommended 59% additionality | 27                |
| 206                                      | Trend adjusted increase explained by an exponential rise in pediatric TB case detection in all intervention hospitals.                                                                                                                                        | Include                           | 92                |
| 156                                      | Upward progress in notifications due to project activity.                                                                                                                                                                                                     | Include                           | 28                |
| 138                                      | Improvements of case detection due to project efforts to enhance access to X-rays by providing transportation incentives.                                                                                                                                     | Include                           | 106               |
| 93·8                                     | No external activities or interacting factors to explain the increase in the number of cases in the intervention area.                                                                                                                                        | Include                           | 762               |
| 82·7                                     | No external factors cited for increase in case finding.                                                                                                                                                                                                       | Include                           | 468               |
| 66                                       | Decline in notifications in evaluation population due to NGO stopping ACF in 3 out of 4 areas, however there was a general decline in notifications. All forms cases are likely to be additional.                                                             | Include                           | 505               |
| 64                                       | Lower case rates in the control population, making the case rates less comparable to the evaluation population.                                                                                                                                               | Include                           | 124               |
| 58                                       | Clear increase from baseline that is higher than the control population.                                                                                                                                                                                      | Include                           | 1001              |
| <b>Bottom 20% additionality projects</b> |                                                                                                                                                                                                                                                               |                                   |                   |
| -100                                     | Value from baseline report. Overall project additionality could not be found.                                                                                                                                                                                 | Exclude                           | 1367              |
| -22                                      | Unstable and delayed notification since data only available until 2015.                                                                                                                                                                                       | Exclude                           | 10653             |
| -17·75                                   | Change from paper-based to web-based reporting, potentially contributing to incomplete notifications.                                                                                                                                                         | Exclude                           | 127               |
| -10                                      | Overlapping projects, confounding effects from prior and concurrent projects.                                                                                                                                                                                 | Exclude                           | 1924              |
| -7                                       | External factors included health care workers on strike and national elections closing public health facilities, poor sampling by community volunteers, weak lab capacity, and only 40% of health facilities reported notifications for the first 2 quarters. | Exclude                           | 660               |
| -6                                       | Unadjusted additionality for Bac+ is positive. All Forms lower than predicted.                                                                                                                                                                                | Include                           | 1127              |
| -4                                       | Decline in notifications by 4%, noted high level of seasonality.                                                                                                                                                                                              | Include                           | 1209              |
| -3·8                                     | Hypothesis for negative additionality is that some case finding work in the region was already in effect before the project started.                                                                                                                          | Include                           | 5397              |
| -1                                       | Some cases detected not shown in metrics due to open screening initiative.                                                                                                                                                                                    | Include                           | 338               |
| 1                                        | Lower additionality due to delays in final project permissions.                                                                                                                                                                                               | Include                           | 714               |
| 1                                        | Historical notification data shows a decline in Bac+ notifications.                                                                                                                                                                                           | Include                           | 528               |

**Table A4: CHW compensation by fixed and variable component and World Bank country classification**

|                                                    | LI (n=15) | MI (n=16) | HI (n=19) | Total (n=50) | p-value |
|----------------------------------------------------|-----------|-----------|-----------|--------------|---------|
| <b>Total compensation (Variable + fixed)</b>       |           |           |           |              |         |
| Average total compensation/month (USD)             | 127.77    | 210.62    | 127.51    | 153.31       | 0.106   |
| Low income countries                               | 118.75    | 50.00     | 45.33     | 89.85        | ..      |
| Lower middle income countries                      | 132.20    | 172.00    | 141.93    | 149.23       | ..      |
| Upper-middle income countries                      | 301.50    | 400.00    | ..        | 334.33       | ..      |
| <b>Fixed-component compensation</b>                |           |           |           |              |         |
| Earned a fixed component (salary or stipend)       | 10 (67%)  | 13 (81%)  | 14 (74%)  | 37 (74%)     | 0.651   |
| Average fixed compensation/month (USD)             | 97.31     | 172.31    | 107.61    | 124.44       | 0.219   |
| Low income countries                               | 125.00    | 50.00     | 11.67     | 62.14        | ..      |
| Lower middle income countries                      | 101.60    | 131.36    | 118.42    | 117.61       | ..      |
| Upper-middle income countries                      | 301.5     | 400.00    | ..        | 334.33       | ..      |
| <b>Variable-component compensation</b>             |           |           |           |              |         |
| Earned a variable component (incentives)           | 8 (57%)   | 10 (63%)  | 9 (50%)   | 27 (56%)     | 0.762   |
| Average variable compensation/month (USD)          | 30.46     | 38.31     | 19.91     | 28.87        | 0.523   |
| Low income countries                               | 33.33     | 0.00      | 33.67     | 27.71        | ..      |
| Lower middle income countries                      | 30.60     | 40.64     | 23.51     | 31.61        | ..      |
| Upper-middle income countries                      | 0.00      | 0.00      | ..        | 0.00         | ..      |
| <b>Non-monetary incentives</b>                     |           |           |           |              |         |
| Priority access to TB/HIV or other disease testing | 3 (23%)   | 4 (33%)   | 9 (50%)   | 16 (37%)     | 0.294   |
| Health insurance                                   | 2 (15.4%) | 1 (8.3%)  | 4 (22.2%) | 7 (16%)      | 0.597   |
| <b>GDP per capita (USD)</b>                        |           |           |           |              |         |
| Average GDP per capita (USD)                       | 2539.23   | 1757.31   | 1983.35   | 2077.78      | 0.368   |
| Low income countries                               | 565.75    | 719.10    | 909.50    | 714.88       | ..      |
| Lower middle income countries                      | 1737.54   | 2067.48   | 1693.82   | 1838.56      | ..      |
| Upper-middle income countries                      | 6977.70   | 6652.27   | 4135.60   | 5704.90      | ..      |

**Table A5: CHWs compensation by World Bank country classification**

|                                           | Low Income | Lower-middle Income | Upper-middle Income |
|-------------------------------------------|------------|---------------------|---------------------|
| Provided fixed compensation               | 6 (60%)    | 28 (82%)            | 3 (50%)             |
| Average fixed compensation/month (USD)    | 92.00      | 139.39              | 334.33              |
| Fixed income as a % of GDP/capita         | 16.6%      | 7.8%                | 5.3%                |
| Provided variable compensation            | 6 (60%)    | 21 (62%)            | 0 (0%)              |
| Average variable compensation/month (USD) | 50.25      | 51.35               | ..                  |
| Variable income as a % of GDP/capita      | 7.8%       | 3.3%                | ..                  |

**Table A6: Differentiated contracts stratified by impact level**

|                                                               | LI | MI | HI | Total |
|---------------------------------------------------------------|----|----|----|-------|
| <b>Provided different contracts</b>                           | 1  | 2  | 7  | 10    |
| Different contracts for salaried vs volunteer workers         | 1  | 1  | 0  | 2     |
| Different contracts based on position                         | 0  | 0  | 1  | 1     |
| Different contracts from NGO vs. government or other partners | 0  | 0  | 4  | 4     |
| Additional transportation contract                            | 0  | 0  | 1  | 1     |
| Incentive based contracts                                     | 0  | 0  | 1  | 1     |
| Unknown                                                       | 0  | 1  | 0  | 1     |

**Table A7: STROBE Checklist**

| Section                             | Recommendation                                                                                                                                                                                                                                                                                                                                                                                                  | Comments                                                                                                                         |
|-------------------------------------|-----------------------------------------------------------------------------------------------------------------------------------------------------------------------------------------------------------------------------------------------------------------------------------------------------------------------------------------------------------------------------------------------------------------|----------------------------------------------------------------------------------------------------------------------------------|
| Title                               | Indicate the study's design with a commonly used term in the title or the abstract                                                                                                                                                                                                                                                                                                                              | Completed                                                                                                                        |
| Abstract                            | Provide in the abstract an informative and balanced summary of what was done and what was found                                                                                                                                                                                                                                                                                                                 | Completed                                                                                                                        |
| Introduction – background/rationale | Explain the scientific background and rationale for the investigation being reported                                                                                                                                                                                                                                                                                                                            | Completed                                                                                                                        |
| Introduction – objectives           | State specific objectives, including any prespecified hypotheses                                                                                                                                                                                                                                                                                                                                                | Completed                                                                                                                        |
| Methods – study design              | Present key elements of study design early in the paper                                                                                                                                                                                                                                                                                                                                                         | Completed                                                                                                                        |
| Methods – setting                   | Describe the setting, locations, and relevant dates, including periods of recruitment, exposure, follow-up, and data collection                                                                                                                                                                                                                                                                                 | Completed                                                                                                                        |
| Methods – participants              | Give the eligibility criteria, and the sources and methods of selection of participants                                                                                                                                                                                                                                                                                                                         | Completed                                                                                                                        |
| Methods – variables                 | Clearly define all outcomes, exposures, predictors, potential confounders, and effect modifiers. Give diagnostic criteria, if applicable                                                                                                                                                                                                                                                                        | Diagnostic criteria not relevant to this study                                                                                   |
| Methods – data sources/measurement  | For each variable of interest, give sources of data and details of methods of assessment (measurement). Describe comparability of assessment methods if there is more than one group                                                                                                                                                                                                                            | Full survey provided in supplemental files.                                                                                      |
| Methods – bias                      | Describe any efforts to address potential sources of bias                                                                                                                                                                                                                                                                                                                                                       | Completed                                                                                                                        |
| Methods – study size                | Explain how the study size was arrived at                                                                                                                                                                                                                                                                                                                                                                       | Completed                                                                                                                        |
| Methods – quantitative variables    | Explain how quantitative variables were handled in the analyses. If applicable, describe which groupings were chosen and why                                                                                                                                                                                                                                                                                    | Completed                                                                                                                        |
| Methods – statistical methods       | (a) Describe all statistical methods, including those used to control for confounding<br>(b) Describe any methods used to examine subgroups and interactions<br>(c) Explain how missing data were addressed<br>(d) If applicable, describe analytical methods taking account of sampling strategy<br>(e) Describe any sensitivity analyses                                                                      | Completed, (e) – sensitivity analyses not applicable                                                                             |
| Results - participants              | (a) Report numbers of individuals at each stage of study—e.g. numbers potentially eligible, examined for eligibility, confirmed eligible, included in the study, completing follow-up, and analyzed<br>(b) Give reasons for non-participation at each stage<br>(c) Consider use of a flow diagram                                                                                                               | Completed                                                                                                                        |
| Results – descriptive data          | (a) Give characteristics of study participants (e.g. demographic, clinical, social) and information on exposures and potential confounders<br>(b) Indicate number of participants with missing data for each variable of interest                                                                                                                                                                               | Completed                                                                                                                        |
| Results – outcome data              | Report numbers of outcome events or summary measures                                                                                                                                                                                                                                                                                                                                                            | Completed                                                                                                                        |
| Results – main results              | (a) Give unadjusted estimates and, if applicable, confounder-adjusted estimates and their precision (e.g., 95% confidence interval). Make clear which confounders were adjusted for and why they were included<br>(b) Report category boundaries when continuous variables were categorized<br>(c) If relevant, consider translating estimates of relative risk into absolute risk for a meaningful time period | (a) Completed<br>(b) – continuous variables were not categorized in this study<br>(c) – relative risk not relevant to this study |
| Results – other analyses            | Report other analyses done—e.g. analyses of subgroups and interactions, and sensitivity analyses                                                                                                                                                                                                                                                                                                                | Univariate and multivariate linear regression completed. Other analyses included in the supplemental files                       |
| Discussion – key results            | Summarize key results with reference to study objectives                                                                                                                                                                                                                                                                                                                                                        | Completed                                                                                                                        |
| Discussion – limitations            | Discuss limitations of the study, taking into account sources of potential bias or imprecision. Discuss both direction and magnitude of any potential bias                                                                                                                                                                                                                                                      | Completed                                                                                                                        |
| Discussion – interpretation         | Give a cautious overall interpretation of results considering objectives, limitations, multiplicity of analyses, results from similar studies, and other relevant evidence                                                                                                                                                                                                                                      | Completed                                                                                                                        |
| Discussion – generalizability       | Discuss the generalizability (external validity) of the study results                                                                                                                                                                                                                                                                                                                                           | Completed                                                                                                                        |
| Other information – funding         | Give the source of funding and the role of the funders for the present study and, if applicable, for the original study on which the present article is based                                                                                                                                                                                                                                                   | Completed                                                                                                                        |

## **Full Survey for Implementers**

Thank you for your participation in our study about the use of healthcare workers in your active case finding project. The study will help us gain insight into the factors and systems that enabled projects to successfully engage community healthcare workers (CHWs).

We are using the term CHW broadly in this survey since in TB REACH Waves 1 through 6, 157 projects from 42 different countries used some form of community layperson to conduct TB active case finding. Your project may have called this cadre of worker another name than CHW such as lady healthcare workers, TB screeners, or ASHAS, but for the purpose of this survey, we are grouping all of these workers under the name CHW.

Please submit this Word document by email at [chwstudy@tbhelp.org](mailto:chwstudy@tbhelp.org). If you have already filled out the Google Form survey, you do not need to send this document.

|                              |                                  |
|------------------------------|----------------------------------|
| 1. Organization name:        | 2. Primary contact name:         |
| 3. Email of primary contact: | 4. Job title of primary contact: |
| 5. Country:                  |                                  |

### **General project information:**

|                                                                   |                                                                                                                                                                                  |
|-------------------------------------------------------------------|----------------------------------------------------------------------------------------------------------------------------------------------------------------------------------|
| 6. Title of the TB REACH project                                  |                                                                                                                                                                                  |
| 7. Project Code                                                   |                                                                                                                                                                                  |
| 8. Type of project (check all that apply)                         | <input type="checkbox"/> Community-based ACF<br><input type="checkbox"/> Facility-based ACF<br><input type="checkbox"/> Private sector<br><input type="checkbox"/> Public sector |
| 9. Did the project employ CHWs to conduct TB active case finding? | <input type="checkbox"/> Yes <input type="checkbox"/> No* <b>If no, please do not continue to fill out this survey.</b>                                                          |

### **Information about CHWs working in the project**

|                                                                                                                                                                                          |                                                                                                                                                                                                                               |
|------------------------------------------------------------------------------------------------------------------------------------------------------------------------------------------|-------------------------------------------------------------------------------------------------------------------------------------------------------------------------------------------------------------------------------|
| 10. What was the average age of a CHW in your project?                                                                                                                                   | _____ years                                                                                                                                                                                                                   |
| 11. What was the gender breakdown of the CHWs employed in the project?                                                                                                                   | _____% Male<br>_____% Female<br>_____% Other<br><br>Please specify how you define "Other":                                                                                                                                    |
| 12. Was any prior work experience/ training / certification required for employment in the project?                                                                                      | <input type="checkbox"/> Yes <input type="checkbox"/> No <input type="checkbox"/> Unknown<br>12a. If yes, what type of work experience/training/certification?                                                                |
| 13. On average, how many years of education did the CHWs have?                                                                                                                           | _____ years                                                                                                                                                                                                                   |
| 14. At the height of your project, how many CHWs were employed in one month?                                                                                                             |                                                                                                                                                                                                                               |
| 15. During the full duration of the project, how many CHWs worked on the project?                                                                                                        |                                                                                                                                                                                                                               |
| 16. Did the CHWs engaged in your project solely work on TB-related activities or were they part of a larger program that performed other health-related activities (such as maternal and | <input type="checkbox"/> Solely TB-related activities<br><input type="checkbox"/> TB and other health-related activities<br>16a. If TB and other health-related activities, what other tasks were the CHWs asked to complete? |

|                                                        |                                                                                                                                          |
|--------------------------------------------------------|------------------------------------------------------------------------------------------------------------------------------------------|
| child health, vaccines, HIV, population control etc.)? | 16b. If TB and other health-related activities, what was the estimated percentage of their time (FTE) spent on TB-related work:<br>____% |
|--------------------------------------------------------|------------------------------------------------------------------------------------------------------------------------------------------|

### Selection of CHWs

|                                                                                                                                                                                       |                                                                                           |
|---------------------------------------------------------------------------------------------------------------------------------------------------------------------------------------|-------------------------------------------------------------------------------------------|
| 17. What were the main sources you used to find potential CHWs? (For example, CHWs were sourced from volunteers at the district hospital or from an existing pool of HIV counsellors) |                                                                                           |
| 18. Were interviews conducted to select CHWs in your project?                                                                                                                         | <input type="checkbox"/> Yes <input type="checkbox"/> No <input type="checkbox"/> Unknown |

### Contracting of CHWs

|                                                |                                                                                                                                                                                            |
|------------------------------------------------|--------------------------------------------------------------------------------------------------------------------------------------------------------------------------------------------|
| 19. Were CHWs provided with written contracts? | <input type="checkbox"/> Yes <input type="checkbox"/> No <input type="checkbox"/> Unknown                                                                                                  |
| 20. Who provided the contract?                 | <input type="checkbox"/> The TB REACH grantee<br><input type="checkbox"/> A government entity<br><input type="checkbox"/> An NGO (not the grantee)<br><input type="checkbox"/> Other _____ |
| 21. Did all CHWs receive the same contract?    | <input type="checkbox"/> Yes, all received the same contract<br><input type="checkbox"/> No, the project had more than one type of CHW contract                                            |
|                                                | 21a. If No, please describe the types of contracts provided to CHWs:                                                                                                                       |

### Pre-service Training of CHWs

|                                                                                                                  |                                                                                                                                                                                                                                                                                                                                                                                                                                                                                                                                                                           |
|------------------------------------------------------------------------------------------------------------------|---------------------------------------------------------------------------------------------------------------------------------------------------------------------------------------------------------------------------------------------------------------------------------------------------------------------------------------------------------------------------------------------------------------------------------------------------------------------------------------------------------------------------------------------------------------------------|
| 22. What type of pre-service training was conducted? ( <i>check all that apply</i> )                             | <input type="checkbox"/> Face-to-face with an expert trainer in a classroom setting<br><input type="checkbox"/> Face-to-face with an expert trainer in a community setting<br><input type="checkbox"/> Peer-to-peer training in a classroom setting<br><input type="checkbox"/> Peer-to-peer training in a community setting<br><input type="checkbox"/> e-learning<br><input type="checkbox"/> Hands on practice of skills in a classroom setting<br><input type="checkbox"/> Hands on practice of skills in a community setting<br><input type="checkbox"/> Other _____ |
| 23. On average, for how many hours was the pre-service training of a CHW?                                        | _____ hours                                                                                                                                                                                                                                                                                                                                                                                                                                                                                                                                                               |
| 24. Was training mandatory for all CHWs working in the project?                                                  | <input type="checkbox"/> Yes <input type="checkbox"/> No <input type="checkbox"/> Unknown                                                                                                                                                                                                                                                                                                                                                                                                                                                                                 |
| 25. Were CHWs compensated for participating in the training?                                                     | <input type="checkbox"/> Yes <input type="checkbox"/> No <input type="checkbox"/> Unknown                                                                                                                                                                                                                                                                                                                                                                                                                                                                                 |
|                                                                                                                  | 25a. If yes, check the types of compensation:<br><input type="checkbox"/> Cash per diem<br><input type="checkbox"/> Food during training<br><input type="checkbox"/> Other _____                                                                                                                                                                                                                                                                                                                                                                                          |
| 26. Which types of training materials were provided to the CHWs during training? ( <i>Check all that apply</i> ) | <input type="checkbox"/> Project-specific handouts<br><input type="checkbox"/> Project- specific diagnostic algorithms<br><input type="checkbox"/> Project standard operating procedures (SOPs)<br><input type="checkbox"/> Published scientific research<br><input type="checkbox"/> NTP guidelines<br><input type="checkbox"/> None                                                                                                                                                                                                                                     |

|                                                                 |                                                                                           |
|-----------------------------------------------------------------|-------------------------------------------------------------------------------------------|
| 27. Was a certificate provided upon completion of the training? | <input type="checkbox"/> Yes <input type="checkbox"/> No <input type="checkbox"/> Unknown |
|                                                                 | 27a. If yes, who issued the certificate?                                                  |

*Please select the topics that CHWs in your project were trained on prior to implementation of the grant:*

|                                                                                                   |                                                                                           |
|---------------------------------------------------------------------------------------------------|-------------------------------------------------------------------------------------------|
| <b>28. TB Information</b>                                                                         |                                                                                           |
| TB disease and pathogenesis                                                                       | <input type="checkbox"/> Yes <input type="checkbox"/> No <input type="checkbox"/> Unknown |
| Airborne infection control & personal safety measures                                             | <input type="checkbox"/> Yes <input type="checkbox"/> No <input type="checkbox"/> Unknown |
| Bacteriological diagnosis of TB                                                                   | <input type="checkbox"/> Yes <input type="checkbox"/> No <input type="checkbox"/> Unknown |
| Clinical diagnosis of TB                                                                          | <input type="checkbox"/> Yes <input type="checkbox"/> No <input type="checkbox"/> Unknown |
| NTP guidelines                                                                                    | <input type="checkbox"/> Yes <input type="checkbox"/> No <input type="checkbox"/> Unknown |
| Patient confidentiality                                                                           | <input type="checkbox"/> Yes <input type="checkbox"/> No <input type="checkbox"/> Unknown |
| <b>29. TB Screening</b>                                                                           |                                                                                           |
| Screening procedures                                                                              | <input type="checkbox"/> Yes <input type="checkbox"/> No <input type="checkbox"/> Unknown |
| Data collection on paper                                                                          | <input type="checkbox"/> Yes <input type="checkbox"/> No <input type="checkbox"/> Unknown |
| Electronic data collection                                                                        | <input type="checkbox"/> Yes <input type="checkbox"/> No <input type="checkbox"/> Unknown |
| Methods for contact tracing                                                                       | <input type="checkbox"/> Yes <input type="checkbox"/> No <input type="checkbox"/> Unknown |
| Community mobilization strategies                                                                 | <input type="checkbox"/> Yes <input type="checkbox"/> No <input type="checkbox"/> Unknown |
| <b>30. Managing sputum</b>                                                                        |                                                                                           |
| Coaching on how to produce a sputum sample                                                        | <input type="checkbox"/> Yes <input type="checkbox"/> No <input type="checkbox"/> Unknown |
| Sample collection by CHWs                                                                         | <input type="checkbox"/> Yes <input type="checkbox"/> No <input type="checkbox"/> Unknown |
| Sample transport guidelines                                                                       | <input type="checkbox"/> Yes <input type="checkbox"/> No <input type="checkbox"/> Unknown |
| Sample storage guidelines                                                                         | <input type="checkbox"/> Yes <input type="checkbox"/> No <input type="checkbox"/> Unknown |
| <b>31. Treatment support</b>                                                                      |                                                                                           |
| DOT procedures                                                                                    | <input type="checkbox"/> Yes <input type="checkbox"/> No <input type="checkbox"/> Unknown |
| Patient counselling                                                                               | <input type="checkbox"/> Yes <input type="checkbox"/> No <input type="checkbox"/> Unknown |
| Social and psychological needs of TB patients                                                     | <input type="checkbox"/> Yes <input type="checkbox"/> No <input type="checkbox"/> Unknown |
| How to provide psychosocial support                                                               | <input type="checkbox"/> Yes <input type="checkbox"/> No <input type="checkbox"/> Unknown |
| <b>32. Project-specific information</b>                                                           |                                                                                           |
| Expected roles and responsibilities                                                               | <input type="checkbox"/> Yes <input type="checkbox"/> No <input type="checkbox"/> Unknown |
| Collaboration with other CHWs                                                                     | <input type="checkbox"/> Yes <input type="checkbox"/> No <input type="checkbox"/> Unknown |
| Integration of TB services into the wider healthcare system                                       | <input type="checkbox"/> Yes <input type="checkbox"/> No <input type="checkbox"/> Unknown |
| 33. Please list any other topics that CHWs were trained on as part of their pre-service training: |                                                                                           |

*The next section asks about various components of the compensation package provided to CHWs including, fixed components (such as salaries), variable components (like performance-based incentives), and non-monetary components.*

**Compensation- fixed components**

|                                                                                  |                                                                                                                                                                                |
|----------------------------------------------------------------------------------|--------------------------------------------------------------------------------------------------------------------------------------------------------------------------------|
| 34. Did the CHWs earn a fixed component (such as a salary or stipend) per month? | <input type="checkbox"/> Yes <input type="checkbox"/> No* <input type="checkbox"/> Unknown*<br><i>*If No or Unknown please skip to the next section on variable components</i> |
| 34a. Did the fixed compensation package change over the duration of the grant?   | <input type="checkbox"/> The same compensation was offered throughout the entire project<br><input type="checkbox"/> Compensation changed over time                            |



|                                                                                                                                                                                                                                                                                 |                                                                                                                                                                                                                  |
|---------------------------------------------------------------------------------------------------------------------------------------------------------------------------------------------------------------------------------------------------------------------------------|------------------------------------------------------------------------------------------------------------------------------------------------------------------------------------------------------------------|
|                                                                                                                                                                                                                                                                                 | 34b. If compensation changed over time, how did it change?<br>Why was it changed?                                                                                                                                |
| 34c. Were all CHWs compensated equally for the fixed component or did it vary within the implementation areas? (Perhaps it differed for CHWs in urban vs. rural areas or because of specific training or certification, or because CHWs were asked to complete different tasks) | <input type="checkbox"/> The project paid equal, fixed compensation to each CHW<br><input type="checkbox"/> The fixed compensation differed for some CHWs<br>34d. If fixed compensation varied, how did it vary? |
| 34e. On average, how much fixed compensation did CHWs earn per month in the project?                                                                                                                                                                                            | _____ USD                                                                                                                                                                                                        |

### Compensation- variable components

|                                                                                                                                                              |                                                                                                                                                                                                                                   |
|--------------------------------------------------------------------------------------------------------------------------------------------------------------|-----------------------------------------------------------------------------------------------------------------------------------------------------------------------------------------------------------------------------------|
| 35. Did the CHWs earn a variable component (such as performance-based incentives) per month?                                                                 | <input type="checkbox"/> Yes <input type="checkbox"/> No* <input type="checkbox"/> Unknown*<br><i>*If No or Unknown please skip to the next section on non-monetary compensation</i>                                              |
| 35a. Did the variable compensation package change over the duration of the grant?                                                                            | <input type="checkbox"/> The same compensation was offered throughout the entire project<br><input type="checkbox"/> Variable compensation changed over time<br>35b. If variable compensation changed over time, how did it vary? |
| 35c. Outline the variable compensation scheme that was used at the end of the grant. If it differed in implementation areas, please outline how it differed: |                                                                                                                                                                                                                                   |
| 35d. On average, how much variable compensation did CHWs earn per month in the project?                                                                      | _____ USD                                                                                                                                                                                                                         |
| 35e. Please provide the <b>minimum</b> variable compensation that was provided during the grant:                                                             | _____ USD                                                                                                                                                                                                                         |
| 35f. Please provide the <b>maximum</b> variable compensation that was provided during the grant:                                                             | _____ USD                                                                                                                                                                                                                         |

### Compensation- non-monetary compensation

|                                                                                                                                          |                                                                                                                                                                                                                                                                                                                                                                                                                                                                                                                                   |
|------------------------------------------------------------------------------------------------------------------------------------------|-----------------------------------------------------------------------------------------------------------------------------------------------------------------------------------------------------------------------------------------------------------------------------------------------------------------------------------------------------------------------------------------------------------------------------------------------------------------------------------------------------------------------------------|
| 36. Please select all of the non-monetary benefits provided as compensation to the CHWs in your project ( <i>check all that apply</i> ): | <input type="checkbox"/> Food<br><input type="checkbox"/> Supplements<br><input type="checkbox"/> Stationary<br><input type="checkbox"/> Clothing<br><input type="checkbox"/> Mode of transport (motorbike, car, bicycle)<br><input type="checkbox"/> Right to retain project technology such as tablets or phones<br><input type="checkbox"/> Priority access to TB/HIV or other disease testing<br><input type="checkbox"/> Health insurance<br><input type="checkbox"/> Life insurance<br><input type="checkbox"/> Other _____ |
|------------------------------------------------------------------------------------------------------------------------------------------|-----------------------------------------------------------------------------------------------------------------------------------------------------------------------------------------------------------------------------------------------------------------------------------------------------------------------------------------------------------------------------------------------------------------------------------------------------------------------------------------------------------------------------------|

|                                                                                                                           |                                               |
|---------------------------------------------------------------------------------------------------------------------------|-----------------------------------------------|
| 37. Please list any other non-monetary compensation that was provided by the project.                                     |                                               |
| 38. What was the total cost of non-monetary compensation in your grant? (Total budget line for non-monetary compensation) | _____ USD<br><input type="checkbox"/> Unknown |

### Supervision of CHWs

|                                                                                                                                          |                                                                                                                                                                                                                                                                                                                                                                                                                                                                                                                            |
|------------------------------------------------------------------------------------------------------------------------------------------|----------------------------------------------------------------------------------------------------------------------------------------------------------------------------------------------------------------------------------------------------------------------------------------------------------------------------------------------------------------------------------------------------------------------------------------------------------------------------------------------------------------------------|
| 39. What was the supervisory structure in your project? (For example, 2 Directors-> 4Project Managers-> 16Field Coordinator -> 140 CHWs) |                                                                                                                                                                                                                                                                                                                                                                                                                                                                                                                            |
| 40. Could performance issues be addressed by the direct supervisor or would it be elevated to a higher level of management?              | <input type="checkbox"/> Performance issues addressed by direct supervisor<br><input type="checkbox"/> Performance managed addressed by upper management                                                                                                                                                                                                                                                                                                                                                                   |
| 41. What was the gender breakdown of the CHWs' supervisors employed in the project?                                                      | _____ % Male<br>_____ % Female<br>_____ % Other<br><br>Please specify how you define other:                                                                                                                                                                                                                                                                                                                                                                                                                                |
| 42. On average, how many CHWs would one supervisor directly oversee?                                                                     |                                                                                                                                                                                                                                                                                                                                                                                                                                                                                                                            |
| 43. Did you use paper or electronic monitoring tools to track the activities and performance of the CHWs?                                | <input type="checkbox"/> Paper-based tools<br><input type="checkbox"/> Electronic tools<br><input type="checkbox"/> Both                                                                                                                                                                                                                                                                                                                                                                                                   |
| 44. Specifically, which tools did you use to track the activities and performance of the CHWs? (Check all that apply)                    | <input type="checkbox"/> Monitoring forms<br><input type="checkbox"/> Screening data<br><input type="checkbox"/> GPS data<br><input type="checkbox"/> Timesheets<br><input type="checkbox"/> Financial data<br><input type="checkbox"/> Verification with external stakeholders (Such as clinic staff)<br><input type="checkbox"/> Lab registers<br><input type="checkbox"/> Routine surveillance data<br><input type="checkbox"/> Customer Relationship Management Software (CRM)<br><input type="checkbox"/> Other _____ |
| 45. On average, how often would supervisors review the work of a CHW per quarter?                                                        | _____ times per quarter                                                                                                                                                                                                                                                                                                                                                                                                                                                                                                    |
| 46. On average, how often would supervisors provide direct verbal feedback to the CHWs they supervised?                                  | _____ times per quarter                                                                                                                                                                                                                                                                                                                                                                                                                                                                                                    |

### Refresher training(s)

|                                                                                    |                                                                                           |
|------------------------------------------------------------------------------------|-------------------------------------------------------------------------------------------|
| 47. How often did you conduct refresher training during the duration of the grant? | _____ times during the grant                                                              |
| 48. On average, for how many hours was a refresher training for a CHW?             | _____ hours                                                                               |
| 49. Did all CHWs receive refresher training during the grant duration?             | <input type="checkbox"/> Yes <input type="checkbox"/> No <input type="checkbox"/> Unknown |
|                                                                                    | 49a. If no, who received refresher training?                                              |
|                                                                                    | <input type="checkbox"/> Formal                                                           |

|                                                                            |                                                                                                                                                                                                                                                                                                                                                                                                                                                                                                                                                                                                                                                                       |
|----------------------------------------------------------------------------|-----------------------------------------------------------------------------------------------------------------------------------------------------------------------------------------------------------------------------------------------------------------------------------------------------------------------------------------------------------------------------------------------------------------------------------------------------------------------------------------------------------------------------------------------------------------------------------------------------------------------------------------------------------------------|
| 50. Were refresher trainings formal or informal?                           | <input type="checkbox"/> Informal<br><input type="checkbox"/> No refresher training was conducted                                                                                                                                                                                                                                                                                                                                                                                                                                                                                                                                                                     |
|                                                                            | 50a. If formal, what were the formal modes of refresher training? (check all that apply)<br><input type="checkbox"/> Face-to-face with an expert trainer in a classroom setting<br><input type="checkbox"/> Face-to-face with an expert trainer in a community setting<br><input type="checkbox"/> Peer-to-peer training in a classroom setting<br><input type="checkbox"/> Peer-to-peer training in a community setting<br><input type="checkbox"/> e-learning<br><input type="checkbox"/> Hands on practice of skills in a classroom setting<br><input type="checkbox"/> Hands on practice of skills in a community setting<br><input type="checkbox"/> Other _____ |
| 51. Were the CHWs compensated for participating in the refresher training? | <input type="checkbox"/> Yes <input type="checkbox"/> No <input type="checkbox"/> Unknown                                                                                                                                                                                                                                                                                                                                                                                                                                                                                                                                                                             |
|                                                                            | 51a. If yes, check the types of compensation:<br><input type="checkbox"/> Cash per diem<br><input type="checkbox"/> Food during training<br><input type="checkbox"/> Other _____                                                                                                                                                                                                                                                                                                                                                                                                                                                                                      |
|                                                                            | 51b. What was the average cost per participant of participating in the refresher-service training? _____                                                                                                                                                                                                                                                                                                                                                                                                                                                                                                                                                              |

### CHW upward mobility

|                                                                                                                            |                                                                                           |
|----------------------------------------------------------------------------------------------------------------------------|-------------------------------------------------------------------------------------------|
| 52. Were any CHWs promoted to a higher role within your organization during or after implementation of the TB REACH grant? | <input type="checkbox"/> Yes <input type="checkbox"/> No <input type="checkbox"/> Unknown |
|                                                                                                                            | 52a. If yes, how many were promoted?                                                      |
|                                                                                                                            | 52b. To what roles were they promoted?                                                    |

### Sustainability of the CHW model

|                                                                                                                    |                                                                                                                                                                                                                                                                                                |
|--------------------------------------------------------------------------------------------------------------------|------------------------------------------------------------------------------------------------------------------------------------------------------------------------------------------------------------------------------------------------------------------------------------------------|
| 53. Did the CHWs working on the TB REACH project keep their jobs at the close of the project?                      | <input type="checkbox"/> Yes, all CHWs kept their jobs<br><input type="checkbox"/> Yes, a subset of CHWs kept their jobs<br><input type="checkbox"/> No <b>*If no, please skip to the next section</b><br><input type="checkbox"/> Unknown <b>*If unknown, please skip to the next section</b> |
| 53a. Did the CHWs continue working with the same roles and responsibilities as during the TB REACH grant?          | <input type="checkbox"/> Yes, they continued with the same job<br><input type="checkbox"/> No, they continued but with different roles and responsibilities<br><input type="checkbox"/> Unknown                                                                                                |
| 53b Did the management structure remain the same as during the TB REACH grant?                                     | <input type="checkbox"/> Yes <input type="checkbox"/> No <input type="checkbox"/> Unknown                                                                                                                                                                                                      |
| 53c Did the compensation package remain the same as during the TB REACH grant?                                     | <input type="checkbox"/> Yes <input type="checkbox"/> No <input type="checkbox"/> Unknown                                                                                                                                                                                                      |
| 53d. Which funding agency or donor continued to support the work of the CHWs at the close of the TB REACH project? |                                                                                                                                                                                                                                                                                                |

### Additional information

|                                                   |  |
|---------------------------------------------------|--|
| 54. Is there anything else you would like to add? |  |
|---------------------------------------------------|--|

**Thank you for your time!**
