# Supplementary material for: What makes community health worker models for tuberculosis active case finding work? A cross-sectional study of TB REACH projects to identify success factors for increasing case notifications
Source: Hum Resour Health. 2022 Mar 12;20:25. doi: 10.1186/s12960-022-00708-1 (PMC8917377; doi:10.1186/s12960-022-00708-1)
Supplement: Supplementary file 2 — Additional File 2. Data from TB REACH project data repository and project implementer survey. Data mined from TB REACH project data repository combined with the project implementer survey. [file 12960_2022_708_MOESM2_ESM.xls]

## Sheet: Data
											Project characteristics											Implementation activities									CHW characteristics								CHW interviewing and contracting						Pre-service training
Number	Project Code	TB REACH Wave	Country	WHO region	World Bank income classifications	GDP per capita (USD)	Total grant amount	Trend-adjusted additional cases	Percent additionality trend-adjusted	Yield	Total population covered	Number verbally screened	Number sputum collected	Number total notifications	Community-based ACF	Facility-based ACF	Public sector	Private sector	Door to door	TB activities	% time spent on TB activities	CHW mandatory training	Community outreach	Verbal screening	HIV testing	Sputum collection	Sputum transportation	Linkage to treatment	Treatment initiation counseling	Treatment adherence counseling	CHW age	CHWs male (%)	CHWs female (%)	CHWs other gender(%)	Any prior work experience/training/certification required for employment in the project	CHWs education	CHWs employed peak	Number of CHWs employed tota	Were interviews conducted to select CHWs	Were CHWs provided with written contracts?	contractor TBreach	contractor gov	contractor ngo	Did all CHWs receive the same contract?	Face-to-face training with expert in the community	Peer-to-peer training in the classroom	Peer-to-peer training in the community	e-learning	Hand-on practice of skills in a classroom setting
1	Congo, p1	1	Congo	African	Low	545.2	604928	806	14.5026	686	3836561	95206	2788	6360	1	1	1	0	0	2	20	.	.	.	.	1	1	0	0	0	45	80	20	0	0	.	.	140	0	0					0	0	0	0	1
2	Ethiopia, p2	1	Ethiopia	African	Low	857.5	689163	5604	178.613	3589	3150000	113167	0	9026	1	0	0	0	1	2	5	1	1	1	0	1	1	1	1	1	25	0	100	0	1	10	1048	1048	1	1	0	1	0	1	0	0	0	0	1
3	Pakistan, p3	1	Pakistan	Eastern Mediterranean	Lower-middle	1284.7	511119	3229	83.2109	3668	1000000	759723	13563	7110	1	1	0	1	0	1	100	1	0	1	0	1	1	1	0	0	20	89	11	0	1	13	19	19	1	1	0	0	1	1	0	1	1	0	1
4	Kenya, p4	2	Kenya	African	Lower-middle	1816.5	999257	-1104	-3.77166	355	6300000	64657	50792	28179	1	0	0	0	0	1	100	1	0	1	0	1	1	1	0	0	27.5	50	50	0	1	10	300	450	0	1	1	0	0	1	0	1	0	0	0
5	Nepal, p5	2	Nepal	South East Asia	Lower-middle	1071.1	630497	-177	-1.80239	1525	31610	7146	37344	9666.38	1	0	0	0	0	1	100	1	1	1	0	1	1	1	0	0	35	30	70	0	0		450	450	1	0					0	1	0	0	1
6	Nigeria, p6	2	Nigeria	African	Lower-middle	2229.9	841218	138	3.7771	968	1350000	150918	6097	3790	1	0	0	1	1	1	100	.	1	1	0	1	0	1	1	0	30	40	60	0	1	15	24	30	1	1	0	0	1	1	1	1	1	0	1
7	Nigeria, p7	2	Nigeria	African	Lower-middle	2229.9	240049	2094	54.9318	619	492225	123587	7839	5906	1	0	0	0	0	1	100	1	1	1	0	1	1	1	1	1	25	70	30	0	0	1	5	50	0	0					0	1	1	0	0
8	Pakistan, p8	2	Pakistan	Eastern Mediterranean	Lower-middle	1284.7	688896	908	13.3556	1550	2767000	350105	7132	7705	0	1	0	1	0	1	100	1	1	1	0	1	1	0	0	0	20	95	5	0	1	.	12	.	1	1	1	0	0	1	0	1	1	0	1
9	Ukraine, p9	2	Ukraine	European	Lower-middle	3659	549445	114	6.49321	831	196692	492225	12082	1874	1	1	1	0	1	2	30	1	1	1	0	1	1	1	1	1	41	20	80	0	.	16	60	60	1	1	1	0	0	1	0	0	0	0	1
10	Haiti, p10	3	Haiti	Americas	Low	754.6	372567	37	5.61404	374	348500	94867	6812	688	1	0	0	0	1	1	100	1	1	1	0	1	1	1	0	0	.	.	.	.	.	.	.	42	1	1	1	0	0	0	1	0	1	0	0
11	India, p11	3	India	South East Asia	Lower-middle	2104.1	271830	263	21.436	472	581321			1492	1	1	1	0	1	2	15	1	1	1	0	1	1	0	0	0	20	20	80	0	1	10	200	750	0	1	1	0	0	0	1	0	0	0	0
12	Pakistan, p12	3	Pakistan	Eastern Mediterranean	Lower-middle	1284.7	1000000	-3475	-16.0676	3155	15975000	736351	15790	18152	1	0	0	1	0	2	70	1	1	1	0	0	0	1	1	1	28	99	1	0	1	20	70	100	1	1	1	0	0	1	0	1	1	0	1
13	South Africa, p13	3	South Africa	African	Upper-middle	6001.4	600000	849	10.5223	111	50880	16639	10033	8914	1	0	1	0	1	1	100	1	1	1	0	0	0	1	1	1	30	.	.	.	0	10	.	.	1	1	1	0	0	1	1	0	0	0	0
14	South Sudan, p14	3	South Sudan	Eastern Mediterranean	Low	1119.7	561896	357	15.9563	1520	10314021	99702	11965	2594	1	1	1	1	0	2	100	1	1	1	0	1	1	1	1	1	25	70	30	0	1	7	100	100	0	1	1	1	0	1	1	1	1	0	1
15	Gambia, p15	4	Gambia	African	Low	751.3	102612	161	19.5089	171	115000	106811	1463	985.5	1	0	0	1	1	1	100	1	0	1	0	0	0	1	0	1	27	59	41	0	1	9	37	60	1	1	1	0	0	1	1	1	1	0	1
16	India, p16	4	India	South East Asia	Lower-middle	2104.1	116942	618	8.59886	31	8313	3894	611	7805	0	0	1	0	0	1	100	1	1	0	0	0	0	1	1	1	27.5	30	70	0	1	12.5	15	15	1	1	1	0	0	1	1	1	1	0	0
17	Indonesia, p17	4	Indonesia	South East Asia	Upper-middle	4135.6	300000	161	210.82	261	71782	91093	2983	237	1	0	0	0	1	2	15	1	1	1	0	0	0	1	1	1	39	2	98	0	0	9	400	1550	1	0					1	0	0	0	1
18	Kenya, p18	4	Kenya	African	Lower-middle	1816.5	471492	-2568	-14.6408	1372	560000	611388	19562	14972	1	1	0	1	0	2	20	1	1	1	0	0	1	1	0	0	37.5	30	70	0	1	12	60	80	1	1	1	0	0	1	1	0	1	0	1
19	Pakistan, p19	4	Pakistan	Eastern Mediterranean	Lower-middle	1284.7	315962	1424	28.9372	1311	1100000	91372	4771	6345	0	1	0	0	1	1	100	1	1	1	0	0	0	0	0	0	25	83	17	0	0	12	12	14	1	1	1	0	0	0	0	1	1	0	0
20	Afghanistan, p20	5	Afghanistan	Eastern Mediterranean	Low	502.1	399969	238	6.45115	626	1258649	310967	5995	3929	1	1	1	1	1	2	50	1	1	1	0	0	0	0	0	0	22	0	100	0	1	12	120	720	0	1	1	0	0	1	0	0	0	0	0
21	Cambodia, p21	5	Cambodia	Western Pacific	Lower-middle	1643.1	400000	741	21.4975	1620	1104965	6275	5620	4190	1	0	0	0	0	1	100	1	1	0	0	0	0	1	1	0	37.5	20	80	0	0	6	72	72	1	1	1	0	0	1	1	0	1	0	0
22	Cambodia, p22	5	Cambodia	Western Pacific	Lower-middle	1643.1	648184	2268	58.2145	2801	1703382	241639	9705	6164	1	0	0	0	1	1	100	.	1	1	0	0	0	1	0	0	30	45	55	0	1	10	300	3558	0	1	0	1	0	0	1	0	0	0	1
23	Ethiopia, p23	5	Ethiopia	African	Low	857.5	402109	55	4.34811	599	643034	19173	3784	1328	1	0	0	0	1	2	90	1	1	1	0	1	0	0	0	0	30	0	100	0	1	14	524	550	0	1	0	1	0	1	1	0	1	0	1
24	India, p24	5	India	South East Asia	Lower-middle	2104.1	387717	1675	66.0071	2626	1063290	228087	12294	4213.74	1	0	0	0	1	1	100	1	1	1	0	1	1	1	1	1	25	21	79	0	0	14	86	86	1	1	1	0	0	1	1	1	0	0	0
25	India, p25	5	India	South East Asia	Lower-middle	2104.1	997476	2603	14.3148	4171	8600000	0	9264	20786	0	0	0	1	0	1	100	.	0	0	0	1	1	0	0	0	37.5	20	80	0	1	12.5	55	55	1	1	1	0	0	1	0	1	1	0	0
26	Indonesia, p26	5	Indonesia	South East Asia	Upper-middle	4135.6	400000	329	63.9803	581	226636	106831	5807	843	1	0	0	0	0	2	15	1	1	1	0	1	1	1	1	1	37.5	6.08	93.92	0	1	9	2000	7	1	0					1	0	0	0	0
27	Mozambique, p27	5	Mozambique	African	Low	491.8	399840	74	7.00958	96	16784	9245	1271	1135	1	1	1	0	0	1	100	1	1	1	1	1	1	1	1	1	25	50	50	0	1	12	6	6	1	1	1	0	0	1	0	1	0	0	1
28	Nepal, p28	5	Nepal	South East Asia	Lower-middle	1071.1	715687	325	8.98038	1092	4416620	58070	27297	3944	1	0	0	0	1	1	100	1	1	1	0	1	1	1	1	1	35	60	40	0	1	10	60	60	1	1	1	0	0	1	0	1	0	0	1
29	Nigeria, p29	5	Nigeria	African	Lower-middle	2229.9	313525	194	169.591	430	2567607	78414	3531	308	1	1	1	1	0	1	100	1	1	1	0	0	1	0	0	0	25	60	40	0	1	12	276	464	1	1	1	0	0	0	1	0	1	1	1
30	Nigeria, p30	5	Nigeria	African	Lower-middle	2229.9	400000	210	5.70248	1804	5823719	367302	20924	3900	1	0	0	0	0	1	100	1	1	1	0	1	1	0	0	0	35	65	35	0	0	12	150	120	1	1	0	0	1	1	0	0	0	0	0
31	Pakistan, p31	5	Pakistan	Eastern Mediterranean	Lower-middle	1284.7	400000	-210	-4.33574	1165	4498280	544717	6391	4626	1	0	1	1	1	2	20	1	1	1	0	1	0	1	0	0	35	0	100	0	1	10	678	805	0	1	0	1	0		0	0	0	0	1
32	Peru, p32	5	Peru	Americas	Upper-middle	6977.7	400000	21	3.55059	94	859819	5487	5456	627	1	0	0	0	0	1	100	1	1	1	0	1	0	1	0	0	35	35	65	0	0	10	100	500	1	1	0	0	1	1	1	1	1	0	1
33	Tanzania, p33	5	Tanzania	African	Lower-middle	1122.1	385850	316	23.9396	740	717477	81496	3115	1637	1	0	0	0	1	2	75	1	1	1	1	1	1	1	1	1	30	40	60	0	1	7	.	480	1	1	1	0	0	1	0	0	0	0	1
34	Vietnam, p34	5	Vietnam	Western Pacific	Lower-middle	2715.3	245900	347	16.586	171	2052095	5692	1105	2436	1	0	0	1	0	1	100	1	1	0	0	0	0	1	0	0	45	50	50	0	0	12	2	4	1	1	0	0	1	1	1	0	0	0	0
35	Vietnam, p35	5	Vietnam	Western Pacific	Lower-middle	2715.3	965578	498	4.55092	1361	5824010	430025	64014	11440	1	1	1	0	0	2	50	1	1	1	1	1	0	1	0	0	40	20	0	80	1	14	280	400	0	1	0	0	1	0	0	1	1	0	1
36	Zambia, p36	5	Zambia	African	Lower-middle	1291.3	886667	371	56.6329	981	309788	20498	5690	1026	1	1	0	0	0	2	90	1	1	1	1	1	0	1	1	1	.	60	40	0	1	9.5	8	8	1	1	1	0	0	0	0	1	0	0	0
37	Bangladesh, p37	6	Bangladesh	South East Asia	Lower-middle	1855.7	386679	181	71.5984	549	1043912	286623	5821	434	1	1	1	1	0	1	100	1	0	1	0	0	0	1	1	1	32	88	12	0	1	16	24	17	1	1	1	0	0	1	1	0	1	1	1
38	Cameroon, p38	6	Cameroon	African	Lower-middle	1497.9	999674	1611	12.365	9051	22447692	2458002	86240	14639	0	1	1	1	1	2	60	.	1	1	0	1	1	0	0	0	31	63	37	0	1	11	88	120	1	1	1	0	0	1	1	0	0	0	1
39	Ethiopia, p39	6	Ethiopia	African	Low	857.5	288004	18	1.28959	56	6817808	33322	801	1430	0	0	0	1	0	1	100	1	1	0	0	0	1	0	0	0	25	30	70	0	1	12	10	10	1	1	1	0	0	1	0	0	0	0	0
40	Ghana, p40	6	Ghana	African	Lower-middle	2202.1	978500	253	20.9621	590	5418651	563868	9898	1462	1	1	0	1	0	1	100	1	1	1	0	1	1	1	1	1	25	42	58	0	1	12	98	101	1	1	0	0	1	1	1	0	0	0	1
41	India, p41	6	India	South East Asia	Lower-middle	2104.1	399992	2113	41.589	1147	416027	667504	8939	7194	0	0	0	1	0	1	100	1	0	1	0	1	1	0	0	0	30	89	11	0	1	12	17.5	38	1	1	0	1	0	1	1	0	0	0	1
42	India, p42	6	India	South East Asia	Lower-middle	2104.1	399993	203	21.9007	441	1754157	354077	3721	1131	1	0	0	0	1	1	100	.	1	1	0	1	1	1	1	1	25	75	25	0	0	14	12	12	1	1	0	0	1	1	0	0	0	0	0
43	Malawi, p43	6	Malawi	African	Low	411.6	399934	13	0.299228	31	6360406	365601	650	4231	1	0	0	0	1	1	100	.	1	1	0	1	1	0	0	0	50	40	60	0	0	.	293	198	1	0					0	0	0	0	0
44	Nepal, p44	6	Nepal	South East Asia	Lower-middle	1071.1	95420	-368	-13.6648	664	2978324	199359	7714	2328	0	0	0	1	0	1	100	1	0	1	0	1	1	1	0	0	25	80	20	0	1	12	20	63	1	1	1	0	0	1	0	0	0	0	0
45	Nigeria, p45	6	Nigeria	African	Lower-middle	2229.9	454265	675	115.856	1015	1764582	509768	11824	1258	1	0	0	0	1	2	75	1	1	1	0	1	1	1	1	1	30	53	47	0	1	12	330	330	1	1	0	0	1	0	1	0	0	0	1
46	Pakistan, p46	6	Pakistan	Eastern Mediterranean	Lower-middle	1284.7	399996	6	9.40001	24	14500	10986	1720	72	1	0	0	0	0	1	100	1	1	1	0	1	0	0	0	0	35	77	23	0	1	3.5	20	25	1	1	1	0	0	1	0	0	0	0	1
47	Peru, p47	6	Peru	Americas	Upper-middle	6977.7	499984	35	2.71017	346	2087388	51690	12235	1313	1	0	0	0	0	1	100	1	1	0	0	0	0	1	1	1	46.3	15	85	0	0	2	7	13	1	1	0	0	1	1	1	0	1	0	0
48	South Africa, p48	6	South Africa	African	Upper-middle	6001.4	400000	-268	-7.71651	882	518690	201540	13750	3208	1	0	0	1	1	1	100	1	1	1	0	0	0	0	0	1	40	4	96	0	1	12	20	20	1	1	1	0	0	1	0	0	0	0	0
49	Tanzania, p49	6	Tanzania	African	Lower-middle	1122.1	399910	564	33.5751	225	2931721	451638	5395	2243	1	0	0	1	0	2	90	1	1	0	0	0	0	1	1	1	47.5	53	47	0	1	1.5	.	171	0	0					1	0	1	0	0
50	Vietnam, p50	6	Vietnam	Western Pacific	Lower-middle	2715.3	398500	20	0.590713	169	1735923	24629	2047	3336	1	0	0	0	0	2	10	1	1	1	0	1	1	1	1	0	35	50	50	0	1	.	7	20	0	1	1	0	0	0	0	1	1	0	1
[truncated: 41 more columns]

## Sheet: Key
Key
For yes or no questions	1 = yes	0 = no
Missing data (denoted by a full stop)	.
Blank cells indicate data not necessary due to skip logic
